# Supplementary material for: Electrochemical and X-ray Photoelectron Spectroscopy Surface Characterization of Interchain-Driven Self-Assembled Monolayer (SAM) Reorganization
Source: MDPI journal article supplement (doi:10.3390/nano12050867), 2022-03-04
Supplement: s1 [file s1]

# Electrochemical and X-ray Photoelectron Spectroscopy Surface Characterization of Interchain-Driven Self-Assembled Monolayer (SAM) Reorganization

Angelo Tricase <sup>1,†</sup>, Anna Imbriano <sup>1,2†</sup>, Nicoletta Ditaranto <sup>1,2</sup>, Eleonora Macchia <sup>3,4</sup>, Rosaria Anna Picca <sup>1,2</sup>, Davide Blasi <sup>1</sup>, Luisa Torsi <sup>1,2,4,\*</sup> and Paolo Bollella <sup>1,2</sup>

<sup>1</sup> Dipartimento di Chimica, Università degli Studi di Bari Aldo Moro, 70125 Bari, Italy; angelo.tricase@uniba.it (A.T.); anna.imbriano@uniba.it (A.I.); nicoletta.ditaranto@uniba.it (N.D.); rosaria.picca@uniba.it (R.A.P.); davide.blasi@uniba.it (D.B.); paolo.bollella@uniba.it (P.B.)

<sup>2</sup> Centre for Colloid and Surface Science, Università degli Studi di Bari Aldo Moro, 70125 Bari, Italy

<sup>3</sup> Dipartimento di Farmacia-Scienze del Farmaco, Università degli Studi di Bari Aldo Moro, 70125 Bari, Italy; eleonora.macchia@uniba.it

<sup>4</sup> Faculty of Science and Engineering, Åbo Akademi University, 20500 Turku, Finland

\* Correspondence: luisa.torsi@uniba.it

† These authors contributed equally to this work.

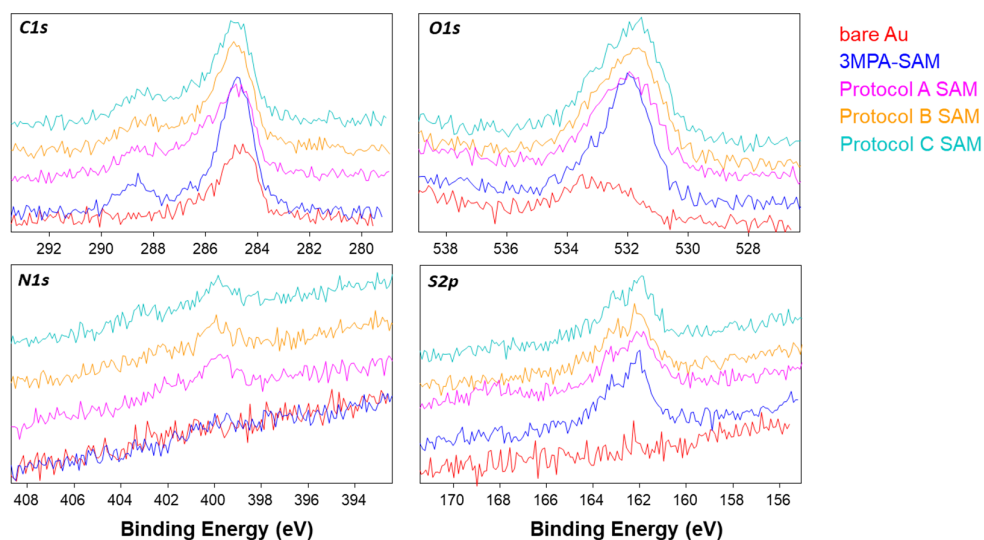

**Figure S1.** Cascade overlapped C1s, O1s, N1s and S2p high resolution spectral regions for the samples reported in colour coded legend.

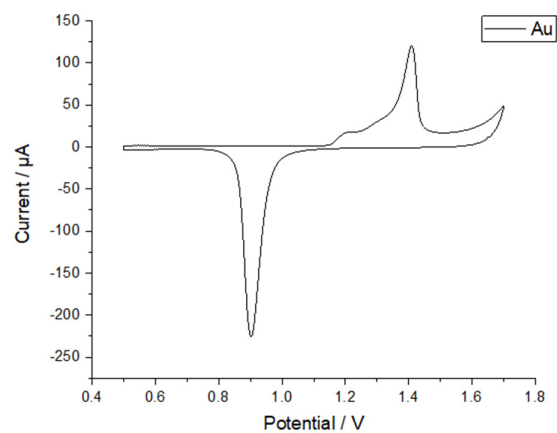

**Figure S2.** Cyclic voltammetry of bare Au in  $\text{H}_2\text{SO}_4$  0.5 M. Experimental conditions: scan range 0.5-1.8 V in positive direction, scan rate  $100 \text{ mV s}^{-1}$ ,  $T=25^\circ\text{C}$ . Peak in cathodic scan between 0.9 and 1.1 V is attributed to the Au reductive peak and proportional to the Au electroactive area [1].

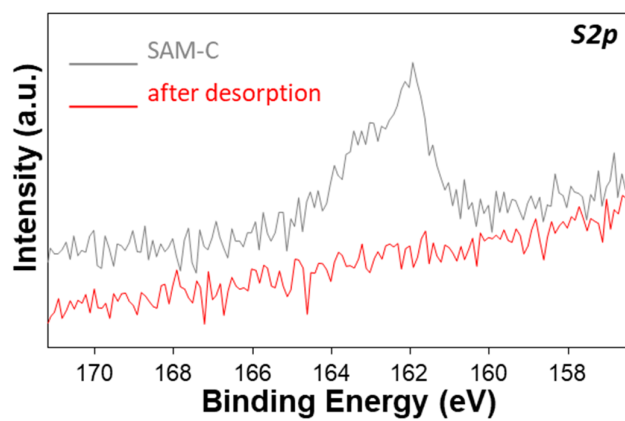

**Figure S3.** S2p XP spectra Protocol-C SAM before (grey) and after (red) the reductive desorption.
